# Supplementary material
Source: Copernicus journal article supplement (doi:10.5194/acp-26-6197-2026)
Supplement: Supplementary file 1 [file acp-26-6197-2026-supplement.pdf]

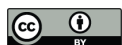

*Supplement of*

## **An improved high-resolution passenger vehicle emission inventory for China using ride-hailing big data**

**Baojie Li et al.**

*Correspondence to:* Baojie Li (baojieli@nuist.edu.cn) and Hong Liao (hongliao@nuist.edu.cn)

The copyright of individual parts of the supplement might differ from the article licence.

20 **Contents**

21 **Figure S1.** Passenger vehicles ownership information.

22 **Figure S2.** Distribution of passenger vehicles by emission standard in different  
23 regions.

24 **Figure S3.** Probability density distributions of passenger vehicle emission factors  
25 across speed intervals and overall frequency statistics.

26 **Figure S4.** Model domain and some traffic congestion area stations.

27 **Figure S5.** Weekly variation in total pollutant emissions from passenger vehicles.

28 **Figure S6.** Spatial distribution of daily average pollutant equivalent emission on  
29 different days.

30 **Figure S7.** The spatial distribution of total pollutant equivalent emission obtained  
31 with the traditional algorithm on a  $0.05^\circ$  grid.

32 **Figure S8.** Comparison of temporal variations between simulated results from the  
33 traditional algorithm inventory and observed data.

34 **Figure S9.** Comparison of simulated values and observed values of some stations.

35 **Table S1.** Emission factors for each emission standard for 5 pollutants.

36 **Table S2.** Average speed correction factor for passenger vehicles under the traditional  
37 algorithm.

38 **Table S3.** Some samples of the original ride-hailing big data.

39 **Table S4.** Detailed information on speed correction curve (SCC).

40 **Table S5.** Deterioration coefficient and sulfur content coefficient of CO, VOC and NO<sub>x</sub>  
41 of passenger cars.

42 **Table S6.** The main physical and chemical schemes adopted in WRF-Chem in this study.

43 **Table S7.** Passenger vehicle emissions at the province-level in 2019.

44 **Table S8.** Simulation validation results.

45

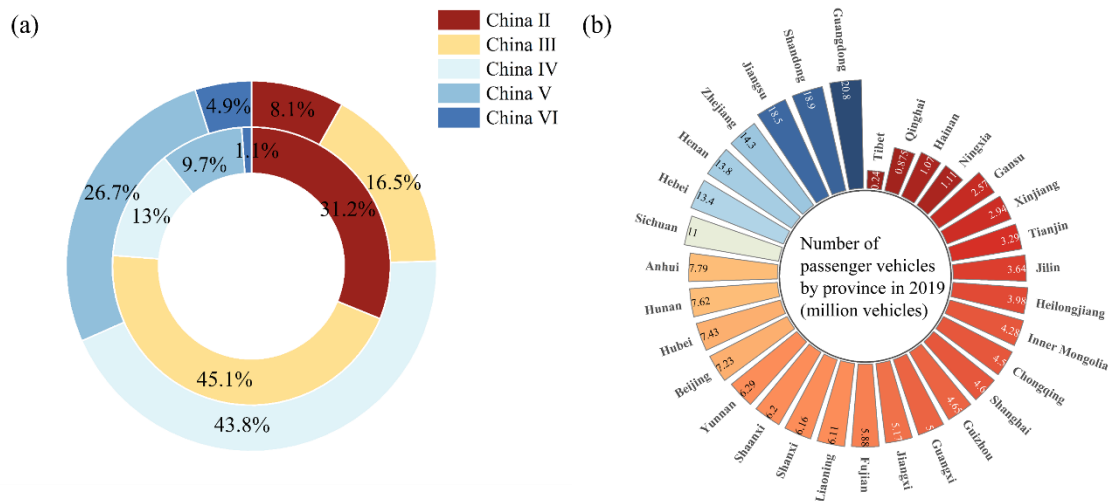

46

47 **Figure S1.** Passenger vehicles ownership information: (a) Percentage of vehicle ownership by emission standard

48 (inner ring is for mini vehicles, outer ring is for small vehicles) and (b) distribution of passenger vehicles ownership

49 by province.

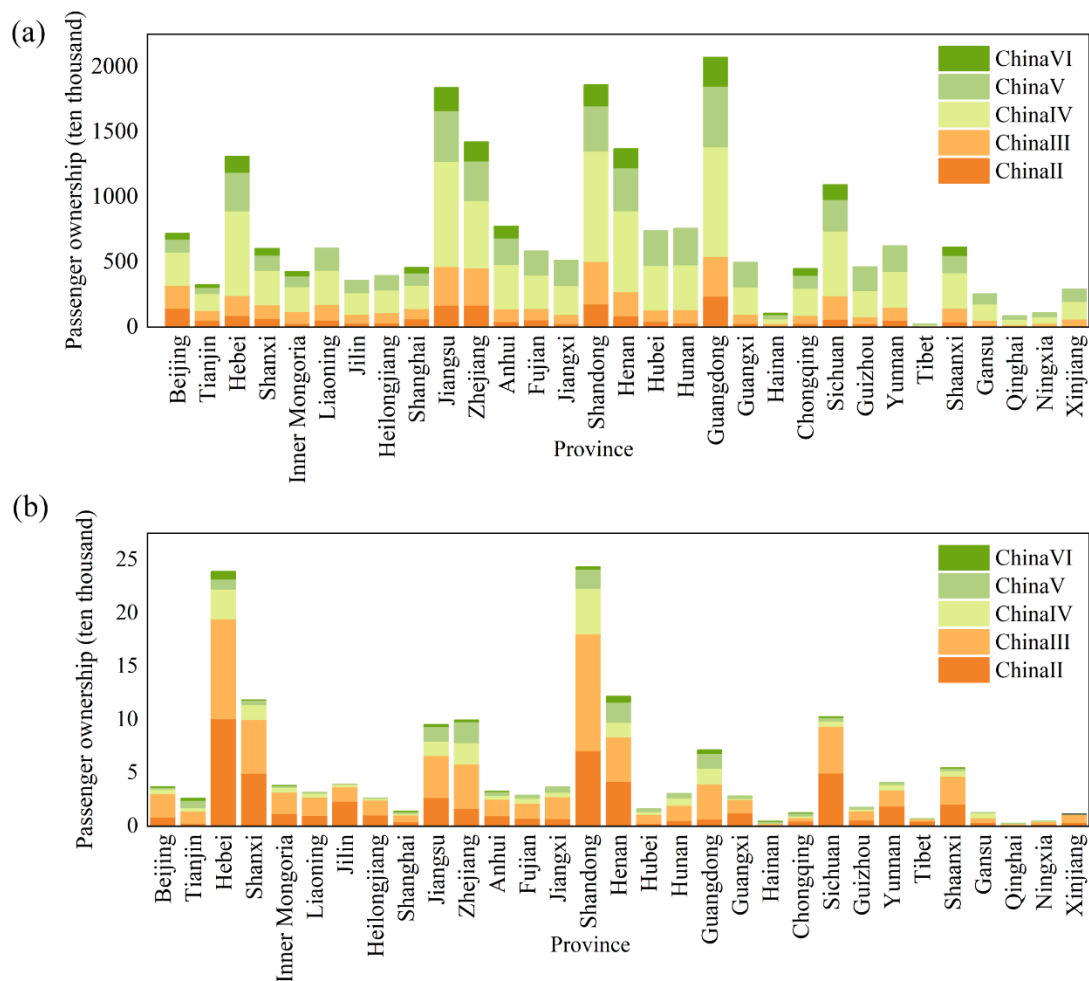

50

51 **Figure S2.** Distribution of passenger vehicles by emission standard in different regions: (a) small-sized vehicles and

52 (b) mini-sized vehicles.

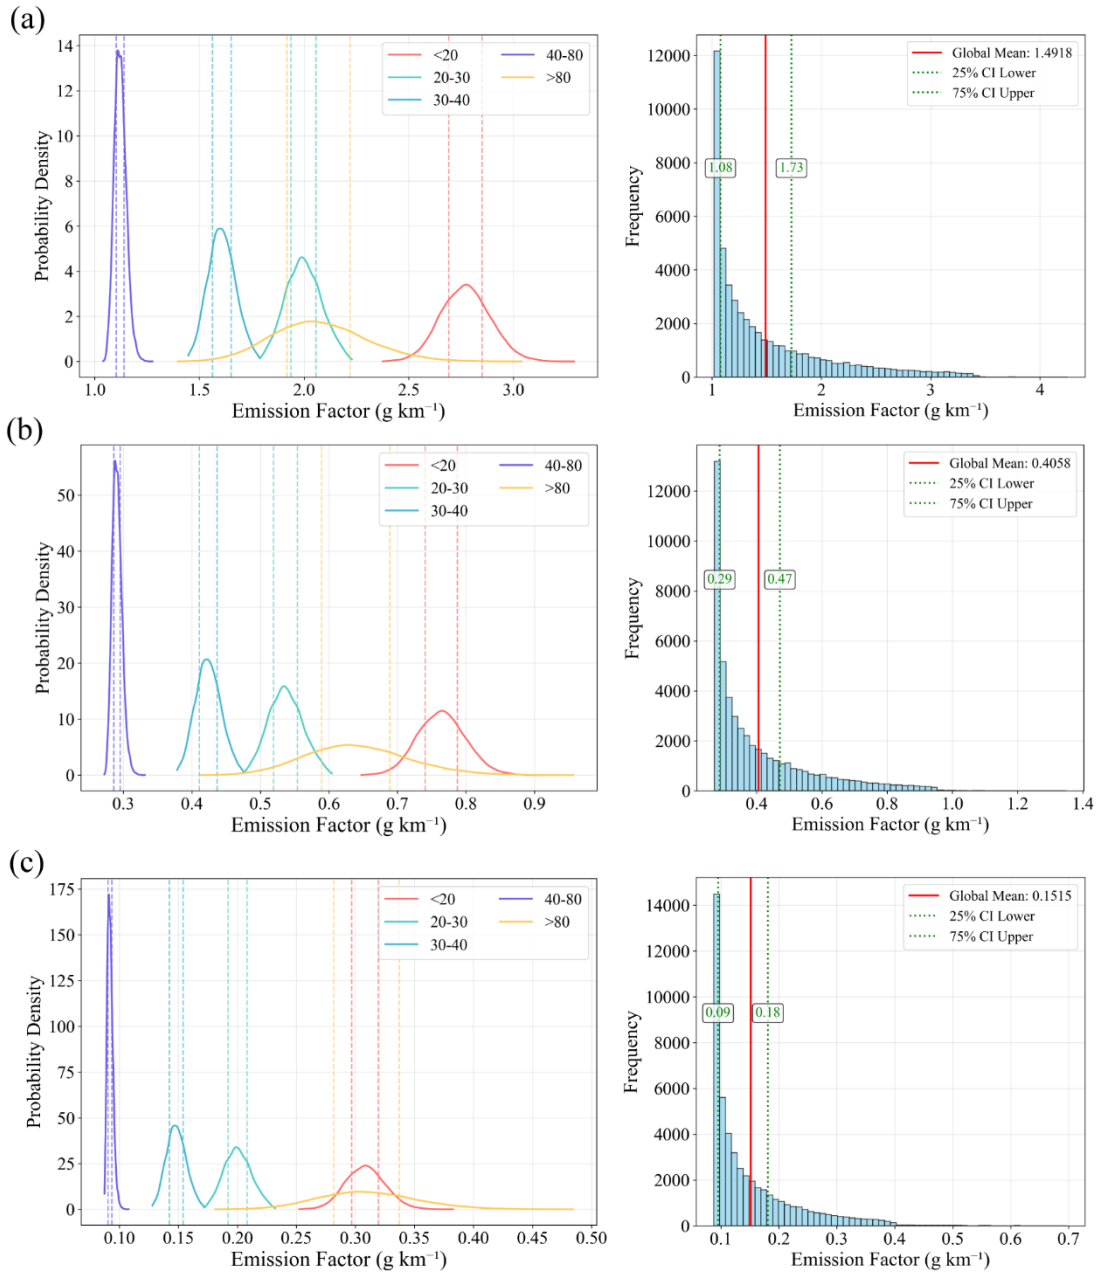

53

54

55

**Figure S3.** Probability density distributions of passenger vehicle emission factors across speed intervals and overall frequency statistics: (a)CO; (b)VOC; (c)NO<sub>x</sub>.

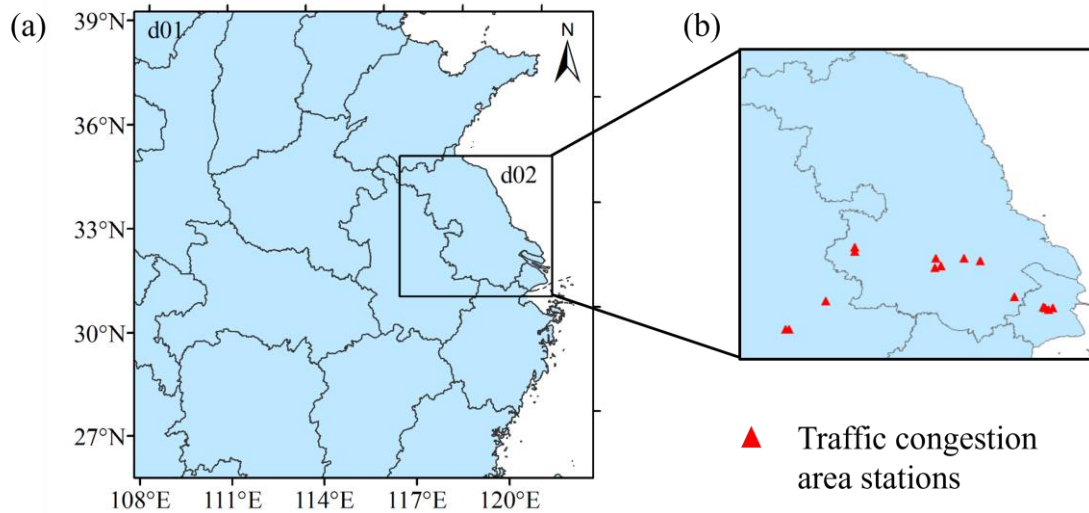

56

57 **Figure S4.** Model domain and some traffic congestion area stations.

58

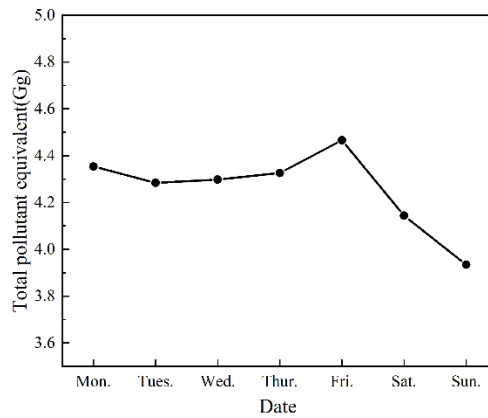

59

60 **Figure S5.** Weekly variation in total pollutant emissions from passenger vehicles.

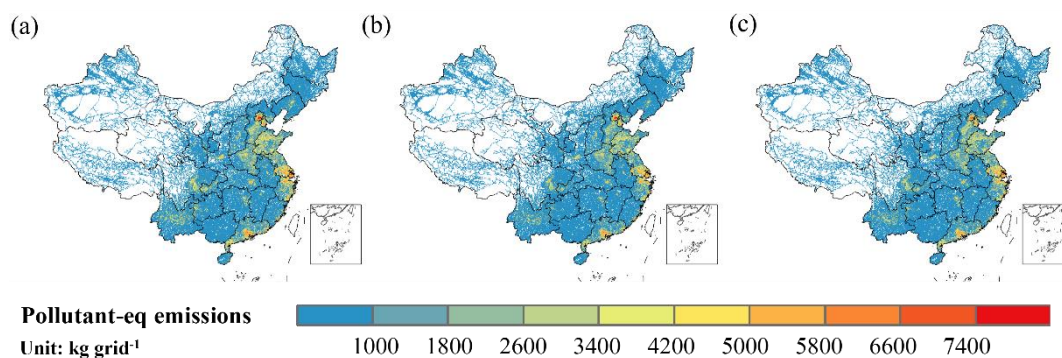

61

62 **Figure S6.** Spatial distribution of daily average pollutant equivalent emissions on different days: (a) Workday; (b)

63 Weekend; (c) Holiday.

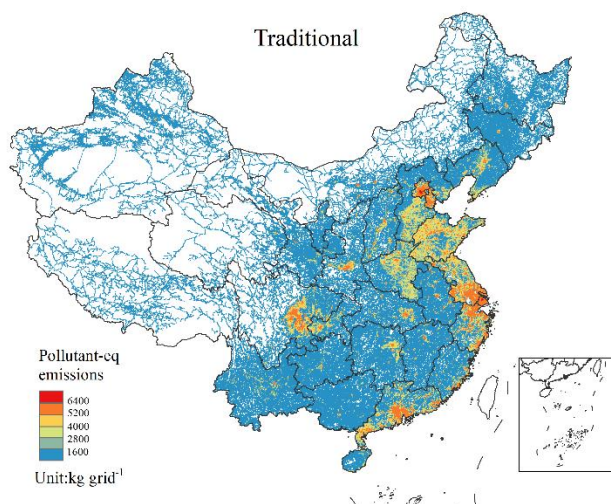

64

65 **Figure S7.** The spatial distribution of total pollutant equivalent emissions obtained with the traditional algorithm on

66 a 0.05° grid.

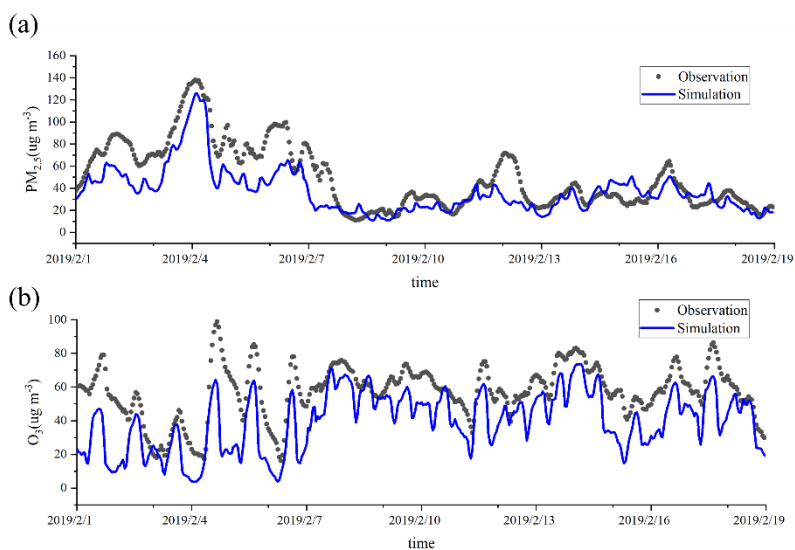

67

68 **Figure S8** Comparison of temporal variations between simulated results from the traditional algorithm inventory

69 and observed data.(a) PM<sub>2.5</sub>; (b) O<sub>3</sub>.

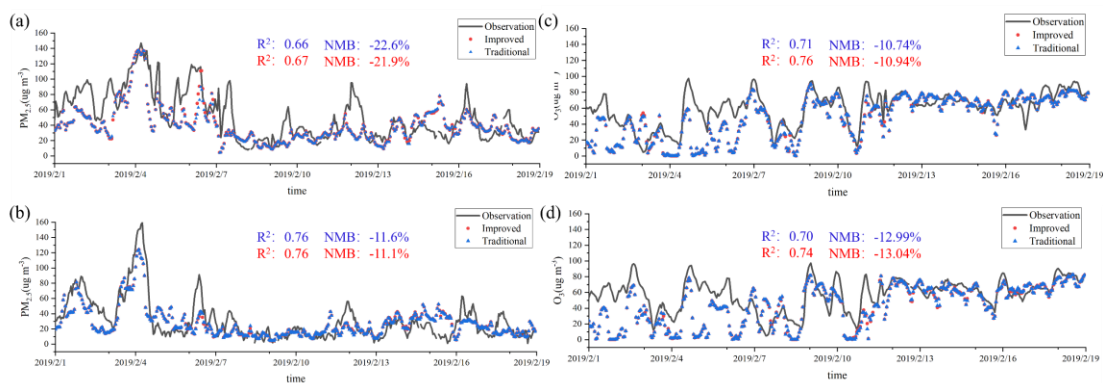

70

71 **Figure S9.** Comparison of simulated values and observed values of some stations: (a) the Administrative Center

72 Monitoring Station, (b) the Putuo Monitoring Station, (c) Pudong Chuansha Monitoring Station, (d) Xinghu Park  
 73 Monitoring Station.

74 **Table S1.** Emission factors for each emission standard for 5 pollutants. (unit: g km<sup>-1</sup>)

|                 | China II | China III | China IV | ChinaV  | ChinaVI | References       |
|-----------------|----------|-----------|----------|---------|---------|------------------|
| CO              | 6.19672  | 2.44      | 1.5645   | 0.68852 | 0.4918  | Wen et al.(2023) |
| VOCs            | 1.4      | 0.825     | 0.45     | 0.25    | 0.075   | Wen et al.(2023) |
| NO <sub>x</sub> | 0.32     | 0.1       | 0.03     | 0.02    | 0.02832 | GEI(2014)        |
| PM              | 0.0022   | 0.0011    | 0.0011   | 0.0014  | 0.0015  | EEA(2019)        |
| NH <sub>3</sub> | 0.1043   | 0.0342    | 0.0341   | 0.0123  | 0.0123  | EEA(2019)        |

75 \*EEA: European Environment Agency

76

77 **Table S2.** Average speed correction factor for passenger vehicles under the traditional algorithm.

| Pollutants      | Speed Range (km h <sup>-1</sup> ) |       |       |       |      |
|-----------------|-----------------------------------|-------|-------|-------|------|
|                 | <20                               | 20-30 | 30-40 | 40-80 | >80  |
| CO              | 1.69                              | 1.26  | 0.79  | 0.39  | 0.62 |
| VOCs            | 1.68                              | 1.25  | 0.78  | 0.32  | 0.59 |
| NO <sub>x</sub> | 1.38                              | 1.13  | 0.90  | 0.86  | 0.96 |
| PM              | 1.68                              | 1.25  | 0.78  | 0.32  | 0.59 |

78

79 **Table S3.** Some samples of the original ride-hailing big data.

|              | Vehicle 1                      | Vehicle 2              | Vehicle 3              |
|--------------|--------------------------------|------------------------|------------------------|
| Vehicle ID   | 10533644                       | 12010817               | 12917912               |
| Longitudes   | 112.86                         | 110.034153             | 106.584487             |
| Latitude     | 22.55783                       | 20.9435499             | 29.161466              |
| Speed        | 10.6                           | 57.0                   | 61.0                   |
| Direction    | 184.0                          | 4.0                    | 171.0                  |
| Send time    | 2019-10-01<br>00:29:32         | 2019-10-01<br>00:29:32 | 2019-10-01<br>00:29:33 |
| Receive time | 2019-10-01<br>00:29:36         | 2019-10-01<br>00:29:36 | 2019-10-01<br>00:29:36 |
| Road name    | Shenzhou-haiyang<br>Expressway | S113                   | Lanhai<br>Expressway   |
| Road type    | 1                              | 4                      | 1                      |

80

81

**Table S4.** Detailed information on speed correction curve (SCC).

| Pollutant       | Speed correction curve (SCC) |
|-----------------|------------------------------|
| CO              | $0.00040V^2-0.0545V+2.25$    |
| VOCs            | $0.00042V^2-0.0565V+2.27$    |
| NO <sub>x</sub> | $0.00020V^2-0.0254V+1.61$    |
| PM              | $0.00042V^2-0.0565V+2.27$    |

82

\*The speed correction curve in this study is referred to Sun et al(Sun et al., 2020).

83

**Table S5.** Deterioration coefficient and sulfur content coefficient of CO, VOC and NO<sub>x</sub> of passenger cars.

| Correction factor             | Small |      |                 | Minicar |      |                 |
|-------------------------------|-------|------|-----------------|---------|------|-----------------|
|                               | CO    | VOCs | NO <sub>x</sub> | CO      | VOCs | NO <sub>x</sub> |
| Deterioration coefficient     | 1.13  | 1.04 | 1.21            | 1.33    | 1.15 | 1.60            |
| Coefficient of sulfur content | 1.03  | 1.03 | 1.02            | 1.18    | 1.14 | 1.09            |

84

\*The formulae and reference values for the deterioration factor are derived from EEA(2019) and

85

Coefficients of sulfur content are obtained from GEI(MEE, 2014).

86

\* “Small” and “Minicar” are the classifications of passenger cars in China Statistical Yearbook(NBS,

87

2020).

88

**Table S6** The main physical and chemical schemes adopted in WRF-Chem in this study.

| Parameterized options | Parameterization scheme |
|-----------------------|-------------------------|
| Cloud microphysics    | Morrison 2-moment       |
| Long-wave radiation   | RRTMG                   |
| Short-wave radiation  | RRTMG                   |
| Cumulus               | Grell-Freitas ensemble  |
| Boundary layer scheme | YSU                     |
| Chemistry option      | CBMZ                    |
| Aerosol option        | MOSAIC                  |
| Photolysis scheme     | 2 Fast-J                |

89

**Table S7.** Passenger vehicle emissions at the province-level in 2019. (Unit: kt)

|                | CO      | VOCs   | NO <sub>x</sub> | NH <sub>3</sub> | PM    |
|----------------|---------|--------|-----------------|-----------------|-------|
| Beijing        | 229.305 | 53.175 | 13.082          | 3.344           | 0.075 |
| Tianjin        | 79.327  | 18.504 | 4.698           | 1.421           | 0.028 |
| Hebei          | 220.816 | 56.646 | 11.144          | 4.656           | 0.113 |
| Shanxi         | 130.817 | 34.684 | 7.611           | 2.412           | 0.055 |
| Inner Mongolia | 80.231  | 21.992 | 4.425           | 1.504           | 0.035 |
| Liaoning       | 111.504 | 28.648 | 5.724           | 2.194           | 0.050 |
| Jilin          | 69.545  | 18.090 | 3.460           | 1.329           | 0.030 |
| Heilongjiang   | 77.073  | 20.381 | 3.485           | 1.392           | 0.035 |
| Shanghai       | 104.048 | 24.886 | 5.212           | 1.786           | 0.047 |
| Jiangsu        | 318.876 | 78.138 | 16.111          | 6.628           | 0.156 |
| Zhejiang       | 295.723 | 70.470 | 14.658          | 5.293           | 0.136 |
| Anhui          | 108.766 | 27.623 | 4.954           | 2.465           | 0.064 |
| Fujian         | 100.146 | 24.155 | 4.801           | 2.108           | 0.052 |
| Jiangxi        | 71.652  | 18.374 | 3.160           | 1.639           | 0.042 |
| Shandong       | 353.804 | 86.309 | 18.427          | 7.066           | 0.160 |
| Henan          | 223.515 | 56.103 | 10.264          | 4.563           | 0.123 |
| Hubei          | 110.281 | 29.204 | 4.655           | 2.337           | 0.063 |
| Hunan          | 105.356 | 27.600 | 4.328           | 2.333           | 0.063 |
| Guangdong      | 378.259 | 86.014 | 19.357          | 7.677           | 0.189 |
| Guangxi        | 76.229  | 19.004 | 3.290           | 1.591           | 0.045 |
| Hainan         | 20.209  | 4.612  | 0.956           | 0.359           | 0.011 |
| Chongqing      | 73.161  | 18.634 | 3.144           | 1.466           | 0.042 |
| Sichuan        | 207.642 | 61.195 | 10.784          | 3.656           | 0.102 |
| Guizhou        | 82.441  | 25.584 | 3.968           | 1.424           | 0.047 |
| Yunnan         | 174.648 | 65.156 | 13.352          | 2.202           | 0.068 |
| Tibet          | 10.006  | 4.187  | 0.894           | 0.094           | 0.003 |
| Shaanxi        | 106.123 | 28.241 | 5.163           | 2.118           | 0.053 |
| Gansu          | 62.998  | 24.705 | 4.364           | 0.841           | 0.023 |
| Qinghai        | 22.840  | 10.105 | 1.613           | 0.267           | 0.007 |
| Ningxia        | 23.528  | 8.005  | 1.614           | 0.387           | 0.009 |
| Xinjiang       | 58.930  | 18.962 | 3.015           | 0.927           | 0.028 |

92 **Table S8.** Simulation validation results of the improved inventory(impr), the traditional algorithm inventory(trad)  
 93 and meteorological validation.

|                                 | R <sup>2</sup> | MB     | NMB    |
|---------------------------------|----------------|--------|--------|
| PM <sub>2.5</sub> _impr_total   | 0.850          | -14.42 | -0.274 |
| PM <sub>2.5</sub> _impr_holiday | 0.839          | -21.91 | -0.348 |
| PM <sub>2.5</sub> _impr_normal  | 0.488          | -8.06  | -0.205 |
| O <sub>3</sub> _impr_total      | 0.771          | -18.50 | -0.325 |
| O <sub>3</sub> _impr_holiday    | 0.764          | -17.39 | -0.322 |
| O <sub>3</sub> _impr_normal     | 0.603          | -16.43 | -0.281 |
| PM <sub>2.5</sub> _trad_total   | 0.850          | -14.48 | -0.275 |
| PM <sub>2.5</sub> _trad_holiday | 0.839          | -22.05 | -0.349 |
| PM <sub>2.5</sub> _trad_normal  | 0.484          | -8.14  | -0.207 |
| O <sub>3</sub> _trad_total      | 0.68           | -18.2  | -0.323 |
| O <sub>3</sub> _trad_holiday    | 0.76           | -17.31 | -0.32  |
| O <sub>3</sub> _trad_normal     | 0.59           | -17.31 | -0.28  |
| T                               | 0.95           | -0.94  | -0.19  |
| Wind speed                      | 0.91           | -0.99  | -0.29  |
| Wind direction                  | 0.76           | -29.03 | -0.15  |

94

95 **References**

96 China Statistical Yearbook; NBS (National Bureau of Statistics of China): China Statistics Press, Beijing,  
 97 2020.

98 EMEP/EEA air pollutant emission inventory guidebook 2019 : technical guidance to prepare national  
 99 emission inventories.; European Environment Agency: 2019.

100 Sun, S., Jin, J., Xia, M., Liu, Y., Gao, M., Zou, C., Wang, T., Lin, Y., Wu, L., Mao, H., and Wang, P.:  
 101 Vehicle emissions in a middle-sized city of China: Current status and future trends, *Environ. Int.*, 137,  
 102 105514, doi:10.1016/j.envint.2020.105514, 2020

103 The Announcement about Releasing Five National Technical Guidelines of the Air Pollutant Emissions  
 104 Inventory., MEE (Ministry of Ecology and Environment), 2014.

105 Wen, Y., Liu, M., Zhang, S., Wu, X., Wu, Y., and Hao, J.: Updating On-Road Vehicle Emissions for China:  
 106 Spatial Patterns, Temporal Trends, and Mitigation Drivers, *Environ. Sci. Technol.*, 57, 14299-14309,  
 107 doi:10.1021/acs.est.3c04909, 2023

108
